# Supplementary material for: Orthogonal interlayer coupling in an all-antiferromagnetic junction
Source: Research Square preprint supplement (doi:10.21203/rs.3.rs-882829/v1), 2021-11-19
Supplement: Supplementary file 1 [file 329eb4debbe257c29187fab7.docx]

Supplementary Materials for

**Orthogonal interlayer coupling in an all-antiferromagnetic junction**

Yongjian Zhou1,3, Liyang Liao1,3, Tingwen Guo1, Hua Bai1, Mingkun Zhao2, Caihua Wan2, Lin Huang1, Lei Han1, Ruyi Chen1, Zhiyuan Zhou1, Xiufeng Han2, Feng Pan1, Cheng Song1✉

1Key Laboratory of Advanced Materials (MOE), School of Materials Science and Engineering, Tsinghua University, Beijing 100084, China.

2Beijing National Laboratory for Condensed Matter Physics, Institute of Physics, University of Chinese Academy of Sciences, Chinese Academy of Sciences, Beijing 100190, China.

3These authors contributed equally to this work.

✉Corresponding author. E-mail: songcheng@mail.tsinghua.edu.cn

**Note 1. Resistivity of samples**

The resistivity measurements were carried out at room temperature. Corresponding results are shown in Fig. S1, confirming the highly insulating characteristic of samples.

**
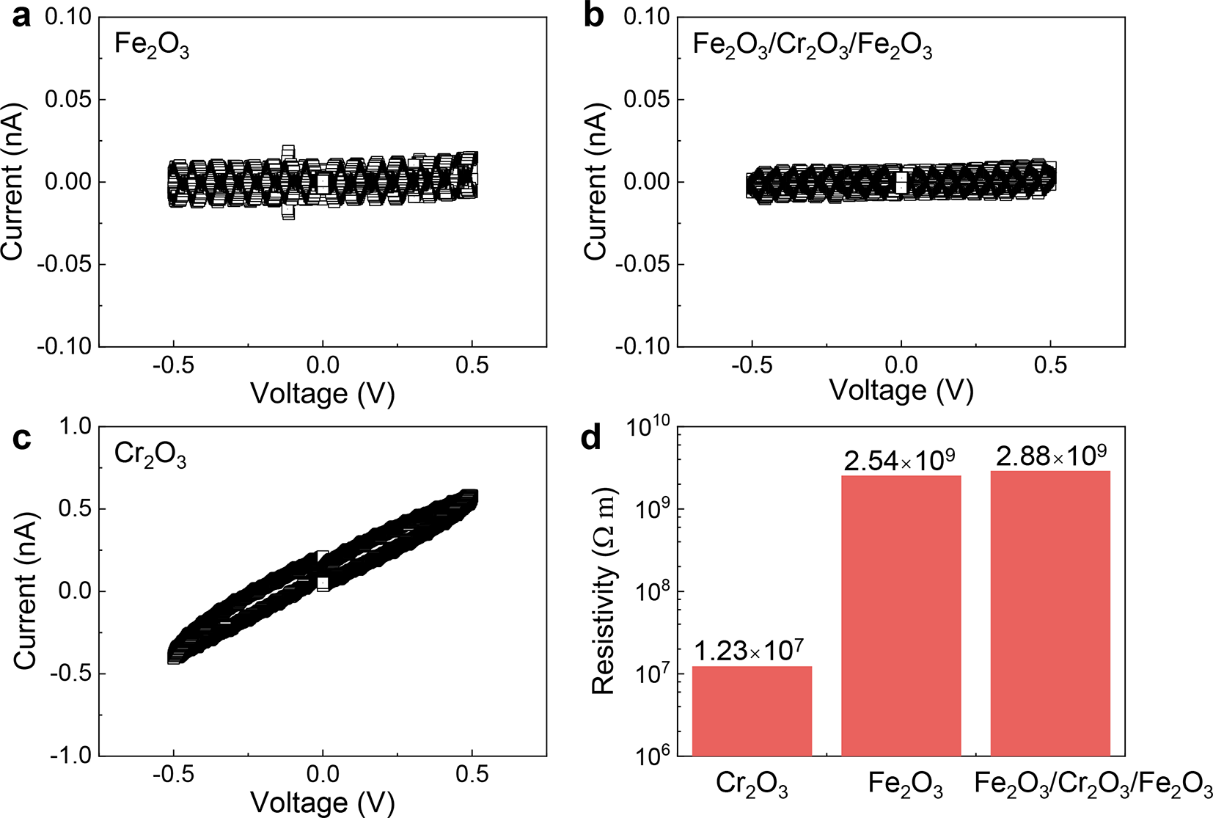
**

**Fig. S1** **Resistivity of samples.** Current-voltage (*I*-*V*) curves of Fe2O3 (**a**), Fe2O3/Cr2O3/Fe2O3 (**b**) and Cr2O3 (**c**). These films were sandwiched by two electrodes for the *I*-*V* measurements. Corresponding resistivity data are calculated and shown in **d**. The ultralow current and concomitantly high resistivity reflect the high insulating characteristic (>GΩ) of the samples. Note that the values of current in **a** and **b** are at the order of pA, which is close to the limit of the sensitivity of semiconductor device analyzer, therefore there exists some noise.

**Note 2. Simulation of the SMR curves**

SMR curves of the control samples (Fig. 2a and b in the main text) show hysteretic behavior, suggesting that the Néel vector is switched when the Zeeman energy overcomes the anisotropy energy. The switching reflects that the degeneracy of the spin-flop states is broken, which is caused by the Dzyaloshinskii-Moriya interaction (DMI)S1. Meanwhile, the curves have no sharp resistance transition, revealing that the switching is step-by-step, because the anisotropy scatters in a certain scale. To mimic these behaviors, we calculate the energy profile of different magnetic configurations to obtain the transition conditions under a given anisotropy. The SMR curves are simulated by varying the anisotropy and estimating the sum of the curves with corresponding transition conditions.

The energy of one Fe2O3 layer can be expressed as

, (S1)

where **H** is the external magnetic field, **m**i (i = 1, 2) is the direction vector of the magnetization of sublattice i, *M*S is the saturated magnetization of one sublattice, *H*E is the exchange field, *H*DM is the DMI effective field and *K*(**m**i) is the anisotropy. Due to the strong exchange couplingS2,S3, we have **m**1 ≈ –**m**2, thus it is convenient to describe the magnetic configuration by the Néel vector **m**1 – **m**2 and the angle α between **m**1 and –**m**2 (α << 1). Set the external field at *x*-axis and minimize the energy by varying α, we have

(S2)

where *θ* is the angle between the Néel vector and the *x*-axis, and *H*A is the three-fold anisotropy effective fieldS4,S5. Note that the influence of α on the anisotropy energy is neglected because the anisotropy field is much smaller than the exchange field, the external field and the DMI effective fieldS2,S3,S6.

We then calculate the energy profile of *θ* = π/2, π and 3π/2 states. The switching condition between these states are obtained by solving E(*θ*1) = E(*θ*2) + 4*K*3, where *θ*1 and *θ*2 are the states before and after the switching, respectively. The 4*K*3 term is added to mimic the barrier between two states. The normalized SMR signal is equal to cos2*θ*, therefore, when the system goes through the *θ* = π/2, π and 3π/2 states, the signal would be 0, 1 and 0, respectively.

As mentioned above, the anisotropy of the sample has a distribution, and the exact form of this distribution is unknown. However, the peak position and the peak width could reflect the center and the range of the distribution of the anisotropy. To give a simple and reasonable approximation, we assume that the distribution of the anisotropy results in a normal distribution *N*(*μ*, *σ*2) of the switching condition, where *μ* and *σ* can be estimated by the average and the standard deviation of the switching conditions calculated from different anisotropy parameters, respectively.

We calculated two SMR curves with *H*A = {1, 3, 5} and {0.4, 1.2, 2} (in Oe), shown in Fig. S2a and b, respectively. Other parameters are set to be *H*E = 9 × 106 Oe and *H*DM = 2 × 104 OeS2,S3,S6. It can be seen that the simulated curves of the first and second *H*A groups are in good agreement with the experimental curves of the Fe2O3 and Cr2O3/Fe2O3 control samples, respectively.

The SMR curve in the antiferromagnetic junction with interlayer coupling (Fig. 2d in the main text) is obtained in a similar way. The energy of the system is given by

(S3)

where *tb* and *tt* are the thickness of the bottom and top layers, respectively, *H*A*b* and *H*A*t* are the anisotropy field of the bottom and top layers, respectively, *θb* and *θt* are the *θ* of the bottom and top layers, respectively, and *J* is the interlayer coupling energy. (*θb*, *θt*) = (π/2, π/2), (π/2, π), (π, 3π/2), (3π/2, 0) and (3π/2, 3π/2) are considered, corresponding to normalized SMR signal 0, 1, 0, 1 and 0, respectively. In SMR curve calculation, when both *H*A*b* and *H*A*t* are involved in the switching condition, we estimate the *σ* parameter in the normal distribution *N*(*μ*, *σ*2) by the sum of the standard derivation of the switching condition caused by each anisotropy field. Using *H*A*b* = {1, 3, 5} and *H*A*t* ={0.4, 1.2, 2} (in Oe), *J*/*M*S*tb* = 7 Oe (corresponding to coupling energy at the order 0.01 meV/unit cell), *tb* = 12 nm, *tt* = 4 nm, we obtain the calculated SMR curve of the antiferromagnetic junction as shown in Fig. 2e in the main text. The calculated curve reproduces the key features of the experimental curve displayed in Fig. 2d in the main text, demonstrating the existence of an orthogonal interlayer coupling in the antiferromagnetic junction.

**
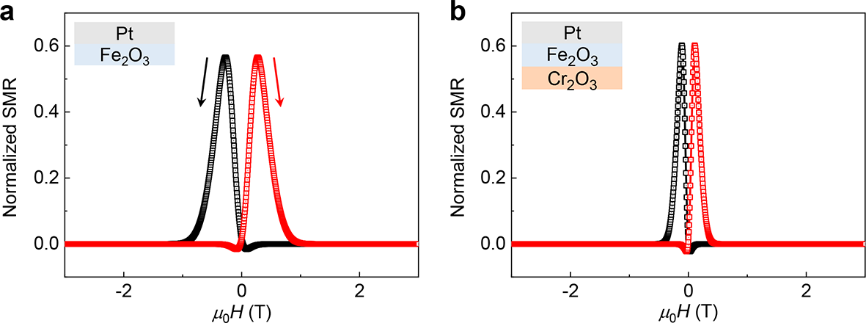
**

**Fig. S2. Simulated SMR curves in control samples. a,** Fe2O3/Pt **b**, Cr2O3/Fe2O3/Pt. The resistance peak in Fe2O3/Pt appears at larger magnetic field than that of Cr2O3/Fe2O3/Pt, indicating a larger spin-flop field in Fe2O3/Pt, which is consistent with the experimental results in Fig. 2A,B in the main text.

**Note 3. HAADF-STEM image of Fe2O3/Cr2O3/Fe2O3**

Figure S3a presents a high-angle annular dark-field scanning transmission electron microscopy (HAADF-STEM) image of the Fe2O3/Cr2O3/Fe2O3 cross-section. The Fourier transform along the zone axis of Cr2O3 (Fig. 3b) and the bottom Fe2O3 (Fig. 3c) reflects the epitaxial growth of the junction.


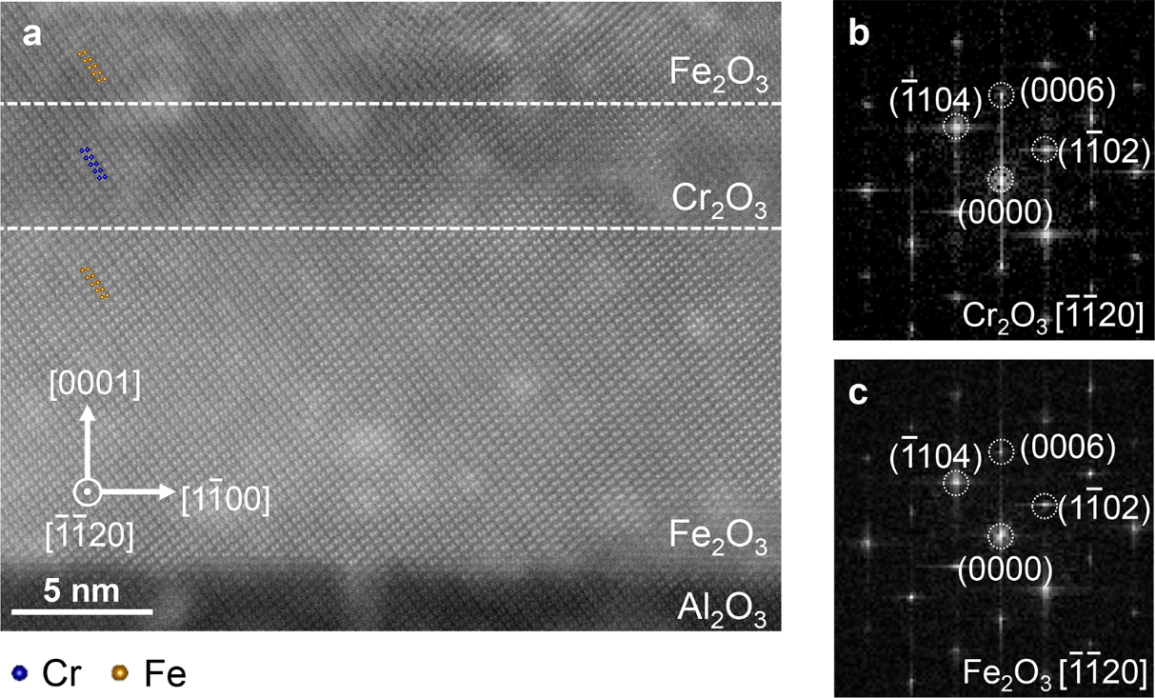


**Fig. S3. HAADF-STEM image and Fourier transform patterns.** **a,** HAADF-STEM image of the Fe2O3/Cr2O3/Fe2O3 junction along the zone axis, where the white dashed lines denote the interfaces. Cr and Fe atoms are highlighted. Note that there exist some bright islands, which is caused by adsorbed platinum during sample preparation by focused ion beam (FIB). The Fourier transform along the zone axis of Cr2O3 (**b**) and the bottom Fe2O3 (**c**) reflects the epitaxial growth.

**Note 4. SMR in Cr2O3/Fe2O3/Pt at various magnetic fields and temperatures**

Figure. S4 shows the angle dependence of SMR in Cr2O3/Fe2O3/Pt under various magnetic field and temperature. In the control samples, at all of the temperatures and magnetic fields used here, the polarities of angle dependent SMR are always negative, reflecting the stable antiferromagnetic feature of Fe2O3 and the Néel vector is perpendicular to the magnetic field (spin-flop state) because of the absence of interlayer coupling effect. The magnetic field dependence of SMR (Fig. S4c) also shows the characteristic of antiferromagnetic SMR. Note that the Cr2O3 grown on Al2O3 substrate should possess Néel temperature within this temperature rangeS7. Therefore, the net moment in Cr2O3 above the Néel temperature cannot lead to interlayer coupling. The angle and field dependence of SMR further supports the existence of interlayer coupling in our Fe2O3/Cr2O3/Fe2O3 antiferromagnetic junction.


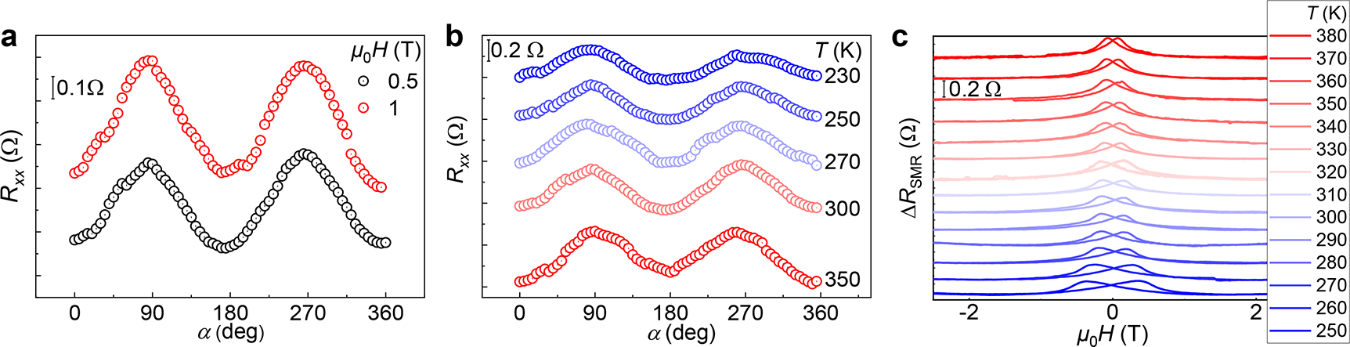


**Fig. S4. SMR in Cr2O3/Fe2O3/Pt at various magnetic fields and temperatures.** **a,** SMR under various magnetic fields *μ*0*H* = 0.5 and 1 T. **b,** Angle dependence of SMR at different temperatures with magnetic field *μ*0*H* = 0.5 T. **c**, Magnetic field dependence of SMR at different temperatures. The curves are shifted vertically for clarity.

**Note 5. Angle dependence of SMR in Fe2O3/Pt and Cr2O3/Fe2O3/Pt**

The angle dependence of SMR in Fe2O3/Pt and Cr2O3/Fe2O3/Pt is shown in Fig. S5. As the magnetic field increases to around 0.2 T, the SMR curve in Cr2O3/Fe2O3/Pt exhibits negative polarity, namely, the low resistance state is obtained when *n* ⊥ *I*, which is the characteristic of antiferromagnetic SMRS8–S10, indicating the Néel vector in the top Fe2O3 tends to be aligned in spin-flop state (*n* ⊥ *H*) gradually. However, the SMR curve in Fe2O3/Pt presents a negative polarity until the magnetic field reaches 0.35 T. The results indicate that the spin-flop field (marked with solid symbols) is higher for the bottom Fe2O3 (~0.35 T) than that of the top Fe2O3 (~0.2 T).


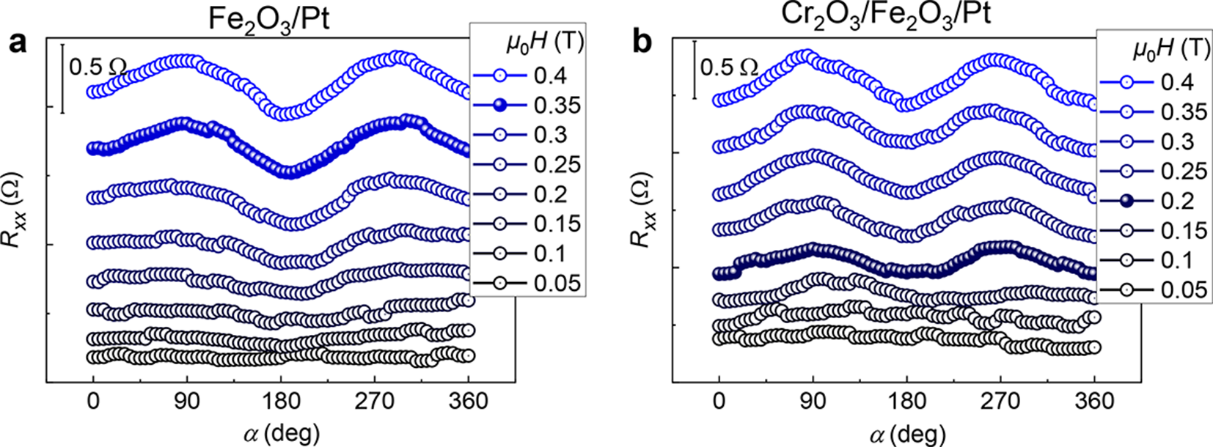


**Fig. S5. Angle dependence of SMR.** Angle dependence of SMR in Fe2O3(12)/Pt(4) (**a**) and Cr2O3(4.4)/Fe2O3(4)/Pt(4)(units in nanometers) (**b**) for different magnetic fields as marked at 300 K.

**Note 6. Exclusion of the influence from defects-related magnetism**

In antiferromagnets, the SMR shows a negative polarity, namely, low resistance states at high *H* reflect that the Néel vector (*n*) of Fe2O3 is perpendicular to the current (*x*) due to the spin-flop at high fields and deviates towards the current direction at low fieldsS8–S10. In ferromagnets, it is well established that the sample exhibits a low resistance state at low *H* (at the coercivity). Therefore, to exclude the effect from weak magnetism (caused by defects or uncompensated interface), we measured the magnetic hysteresis loop (*M*-*H*) of the sample and show the data in Fig. S6a. Concomitant d*M*/d*H* is calculated to characterize the coercivity of the remanent magnetism. The SMR and d*M*/d*H* curves of Fe2O3/Cr2O3/Fe2O3/Pt at 300 K are presented together in Fig. S6b. To compare the magnetic field corresponding to the valley of SMR and the coercivity, an enlarged region between –0.7 and 0.7 T is illustrated in Fig. S6c, where the ranges of the SMR valley and coercivity are marked by the dotted lines (purple region) and solid lines (grey region), respectively. Remarkably, the two regions are located at completely different magnetic fields, indicating that they have no connection. Thus the valley in the SMR curves is not caused by the defects-related magnetism, and any possible coupling between net moment in Cr2O3 and *n* in Fe2O3 are excluded.


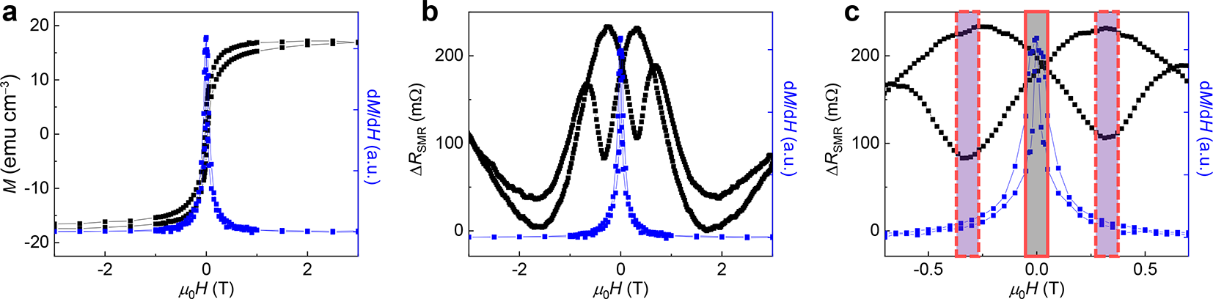


**Fig. S6. Exclusion of the influence from defects-related magnetism.** The *M*-*H* loop and derivative of the *M*-*H* loop (**a**) and SMR (**b**) of the Fe2O3/Cr2O3/Fe2O3/Pt sample at 300 K. An enlarged region between –0.7 and 0.7 T is illustrated in **c**, where the ranges of the SMR valley and coercivity are marked by the dotted lines (purple region) and solid lines (grey region), respectively.

**Note 7. SMR in Fe2O3(4)/Cr2O3(4.4)/Fe2O3(12)/Pt**

The SMR in sandwich with inverted structure, Fe2O3(4)/Cr2O3(4.4)/Fe2O3(12), is performed to detect the direction of Néel vector in thicker Fe2O3 and shown in Fig. S7. The resistance peaks appear after *μ*0*H* = 0 (approximately *μ*0*H* = ±0.3 T), demonstrating that the Néel vector in the 12 nm-thick Fe2O3 maintains spin-flop state owing to the larger Zeeman energy rather than deviating towards *H* at low magnetic field. It indicates that the top and bottom Fe2O3 in main text should be orthogonally coupled. In addition, the spin-flop field of 12 nm-thick Fe2O3 grown on Cr2O3 is larger than that of 4 nm Fe2O3.


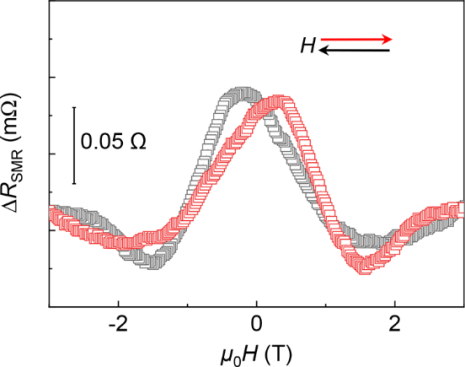


**Fig. S7. SMR in Fe2O3(4)/Cr2O3(4.4)/Fe2O3(12)/Pt.**

**Note 8. XMLD spectra and corresponding antiferromagnetic structures**

Fe *L*-edge x-ray magnetic linear dichroism (XMLD) was also conducted to further explore the coupling effect in antiferromagnets (AFM). Fig. S8a–c shows the XMLD spectra (left panel, also shown in Fig. 2f–h in the main text) and AFM Néel order (right panel) for Fe2O3/Cr2O3/Fe2O3, Fe2O3 and Cr2O3/Fe2O3, respectively. The orange arrows in right panel represent Néel vectors along three easy-axes in the top Fe2O3. A high magnetic field was pre-applied along one of the axes (black arrow, *x*-axis), then removed to perform XMLD, benefiting from the non-volatile characteristic of Fe2O3S6. X-ray was vertically incident to the film and the polarized direction of the x-ray was parallel to the film plane (Fig. S8d). The chamfered edge here is , the direction perpendicular to which is one of the easy-axes and is also the direction of applied field. The XMLD spectra (black line) were taken from the differences of XAS spectra (XAS⊥− XAS//) and then multiply by a factor of 5 at the absorption edges for clarity. The XMLD spectrum in Fig. S8a shows a zero–positive–negative–zero feature, indicating that the Néel vector is mainly along the parallel direction (*n* // *x*-axis), represented by bold orange arrow (right panel in Fig. S8a), confirming the existences of interlayer coupling. In Fe2O3 and Cr2O3/Fe2O3, the XMLD spectra present zero–negative–positive–zero feature, suggesting that the Néel vectors in Fe2O3 are mainly aligned along the spin-flop direction (*n* // *y*-axis) without interlayer coupling (bold orange arrows in Fig. S8b,c right panel). Considering the three-fold easy-axes of Fe2O3, the Néel vectors in the control samples should be aligned along the other two easy-axes with the main components along the direction perpendicular to the magnetic field rather than along itS6.


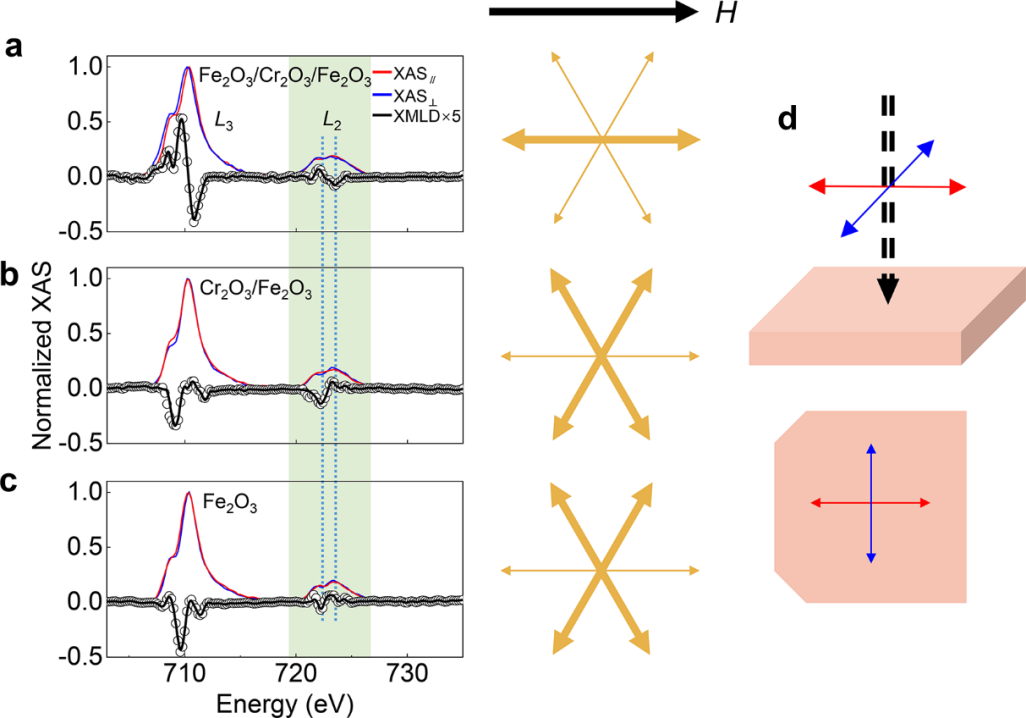


**Fig. S8. XMLD spectra and experiment set-ups.** **a**–**c**,NormalizedXAS spectra, XMLD results and corresponding schematic diagram of the magnetic structures in Fe2O3/Cr2O3/Fe2O3 (**a**), Cr2O3/Fe2O3 (**b**) and Fe2O3 (**c**). The highlighted region denotes Fe-*L*2 edge and the vertical dotted lines are guide for eyes to mark the valley and peak in XMLD curves. The orange arrows denote the Néel vectors in the top Fe2O3. **d,** Schematic illustration of XAS experiments. The x-ray was vertically incident to the film with polarized direction (red and blue arrows) shown in the lower panel.

The XMLD measurements with Fe2O3/Cr2O3/Fe2O3 rotation in the film plane were performed to further determine the interlayer coupling and the direction of the Néel vector in the top Fe2O3. The XMLD spectra at 0º, 30º and 60º are presented in Fig. S9a–c, and the corresponding XAS polarization set-ups as well as Néel order structures are shown in Fig. S9d–f, respectively. When XAS// is parallel to the magnetic field direction, the Néel vector along XAS// is larger than that along XAS⊥ due to the interlayer coupling effect as discussed above and in the main text. When the sample is rotated by 30º, the component of Néel vector along XAS// (red line in Fig. S9e right panel) is slightly larger than that along XAS⊥ (blue line in Fig. S9e right panel), resulting in a relatively weak XMLD signal in Fig. S9b. And the polarity of XMLD is still the same as that at 0º (Fig. S9a). However, when the sample is rotated by 60º, the polarity of XMLD reverse, namely, the component of Néel vector along XAS// is smaller than that along XAS⊥S11,S12, as shown by red and blue lines in Fig. S8f. Through the analysis above, the Néel vector of the top Fe2O3 is demonstrated to be mainly aligned parallel with the direction of applied magnetic field (XAS//), confirming the existence of interlayer coupling in AFM.


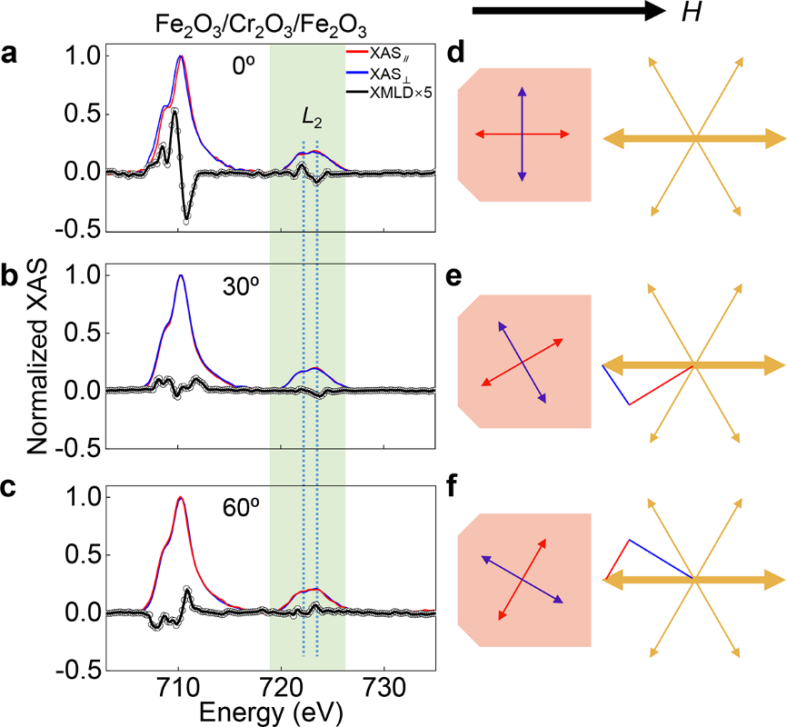


**Fig. S9. XMLD spectra for different in-plane rotation angles.** **a**–**c,** XAS and XMLD spectra of Fe2O3/Cr2O3/Fe2O3 for different various in-plane rotation angles, 0º (**a**) 30º (**b**) and 60º (**c**). **d**–**f,** Schematic diagram of the experimental set-ups and magnetic structures for different in-plane rotation angles, 0º (**d**) 30º (**e**) and 60º (**f**). The polarized directions are shown by red and blue arrows in (**d**–**f**)**.** The orange arrows represent the Néel vectors in the top Fe2O3. The red and blue lines denote the component of Néel vectors along XAS// and XAS⊥, respectively.

**Note 9. SMR in Fe2O3/Cr2O3/Fe2O3/Pt at various temperatures**

The magnetic field dependence of SMR in Fe2O3/Cr2O3/Fe2O3/Pt as a function of temperature are shown in Fig. S10. As the temperature decreases, the second resistance peak decays gradually and the location of first resistance peak shifts towards *H* = 0. At very low temperatures, such as 100 K, the resistance peak appears almost at zero-field. This feature is most likely due to the lower spin-flop field of Fe2O3 resulting from the decrease of the in-plane anisotropy.


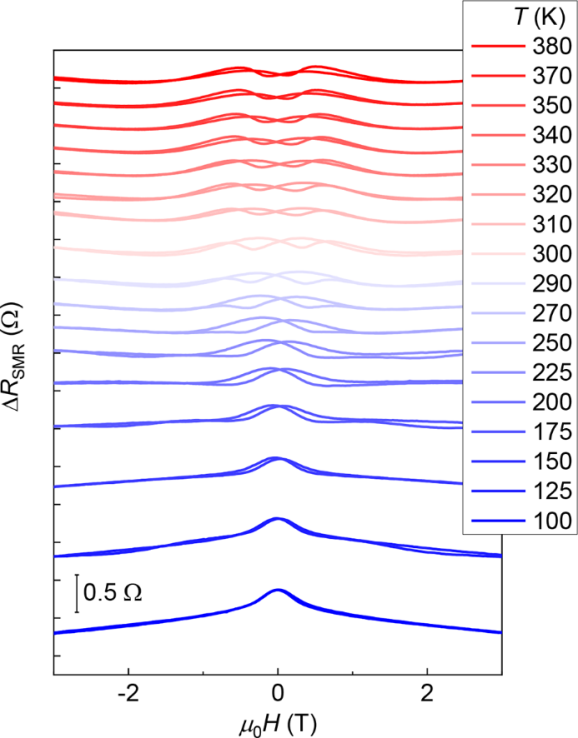


**Fig. S10. Magnetic field dependence of SMR in Fe2O3/Cr2O3/Fe2O3/Pt at various temperatures.** The curves are shifted vertically for clarity.

**Note 10. SMR signals of Fe2O3/Cr2O3/Fe2O3/Pt with magnetic field applied along different directions**

The measurement of SMR with magnetic field applied along different directions are performed with results shown in Fig. S11. In the two cases, the SMR results have very similar characteristics, especially the magnetic fields corresponding to the first resistance peak are almost the same. This observation discloses that the interlayer coupling always exists, irrespective of the magnetic field direction.


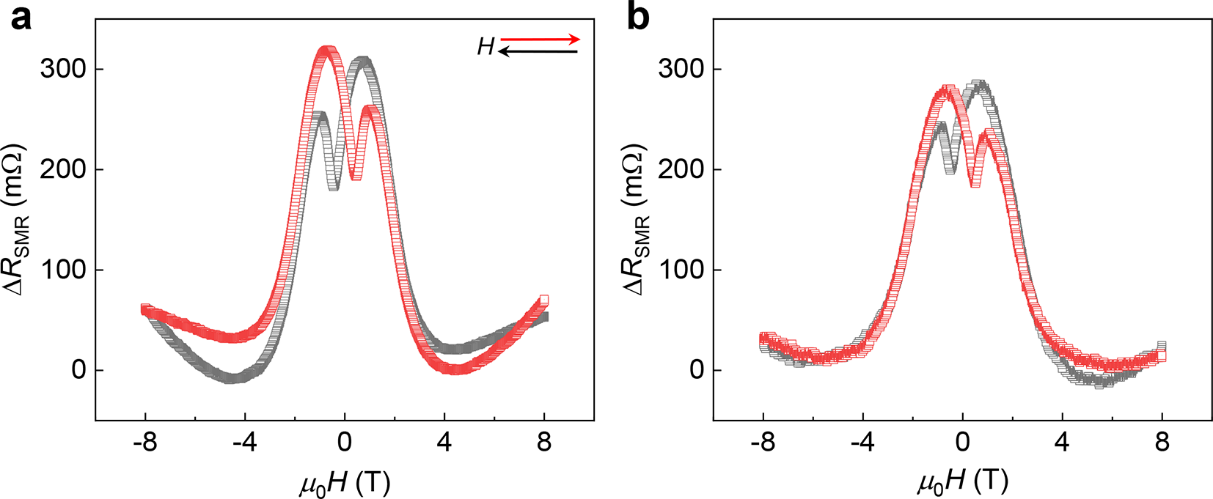


**Fig. S11. SMR signals of Fe2O3/Cr2O3/Fe2O3/Pt with magnetic field applied along different directions.** **a,** parallel with one of the easy-axes **b,** perpendicular to one of the easy-axes.

**Note 11. SMR in Fe2O3/Cr2O3/Fe2O3/Pt with different reading current**

We have measured the field dependence of SMR with current of different signs and magnitudes as shown in Figure. S12. The field dependence of SMR curves varied little with current, indicating the interlayer coupling is an intrinsic property of the structure. The results exclude thermal artifacts such as Seebeck effect or Nernst effect or unidirectional SMR where Δ*R* is proportional to *I*.


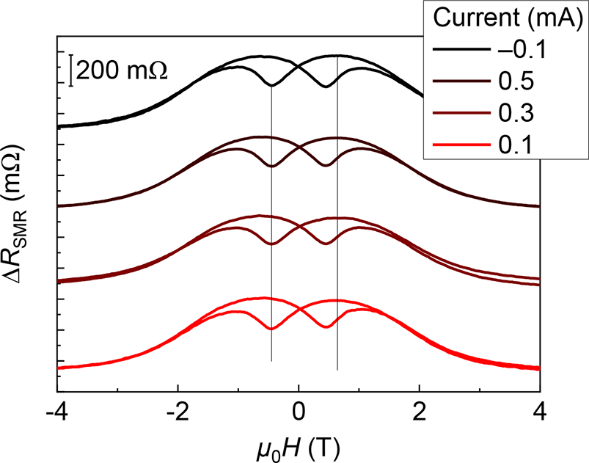


**Fig. S12. Field dependence of SMR measured with different currents.** The applied current has no remarkable influence on the two resistance peak of SMR, indicating interlayer coupling is an intrinsic effect instead of thermal artifacts.

**Note 12. Magnetic field dependence of SMR in Fe2O3/Cr2O3/Fe2O3/Pt with various Cr2O3 thicknesses**

The magnetic field dependence of SMR results with different thickness of Cr2O3 are shown in Fig.S13. Note that the summarized data in Fig. 4a,b in the main text are the average values of these data and their counterparts with the opposite sweeping. There are two most eminent features in this figure: (i) The location (*μ*0*H*Coupling in the main text) of the first peak varies with temperatures, proving that the coupling effect in AFM is temperature-dependent; (ii) the second resistance peak (MR signal in the main text) at the negative magnetic field drops gradually and vanishes eventually with decreasing temperatures. Moreover, the coupling effect still exists even at the temperatures where the MR signal disappears.


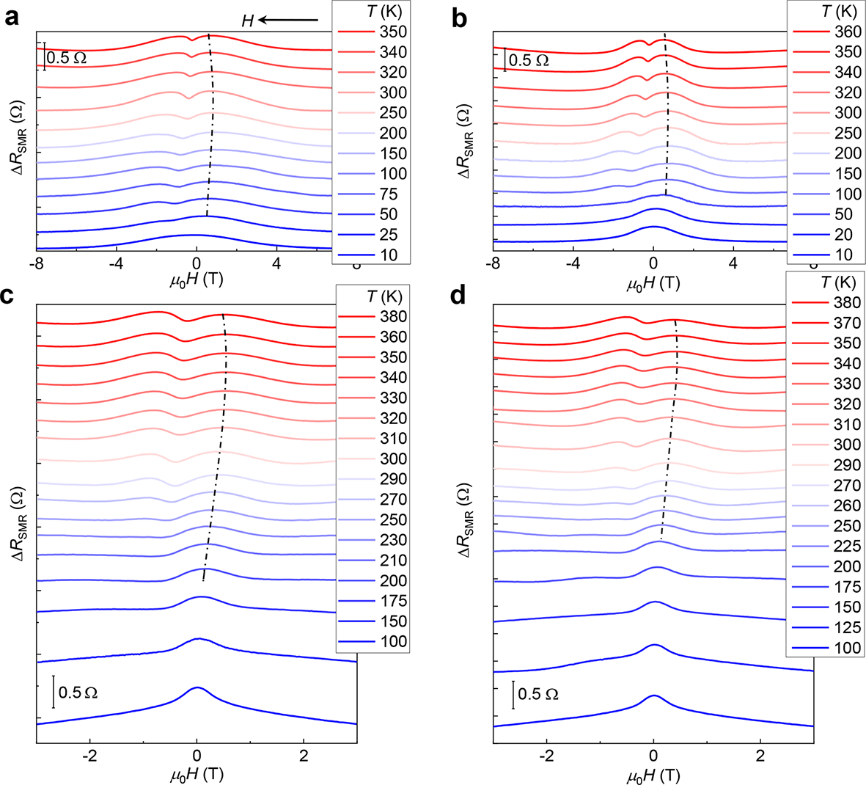


**Fig. S13. Magnetic field dependence of SMR in Fe2O3/Cr2O3/Fe2O3/Pt with various Cr2O3 thicknesses**. **a,** 3.0 nm, **b,** 3.5 nm, **c,** 4.1 nm, and **d,** 4.4 nm. For clarity, only the magnetic field sweeping along one direction (depicted by black arrow, from positive to negative) is displayed. The dashed lines are guide for eyes. The curves are shifted vertically for clarity.

**Note 13. Absence of interlayer coupling with thicker Cr2O3 spacer**

As the thickness of Cr2O3 spacer increases to *t* = 6 nm, only one resistance peak exists at negative magnetic field in Fig. S14a when sweeping *H* from positive to negative, indicating the absence of the interlayer coupling. A similar behavior is also observed when *t* = 12 nm (Fig. S14b). This feature can be explained as follows: in thicker Cr2O3 spacer, the magnetic structure maintains ground state rather than entering the QLRO state. Thus no coupling exists.

**
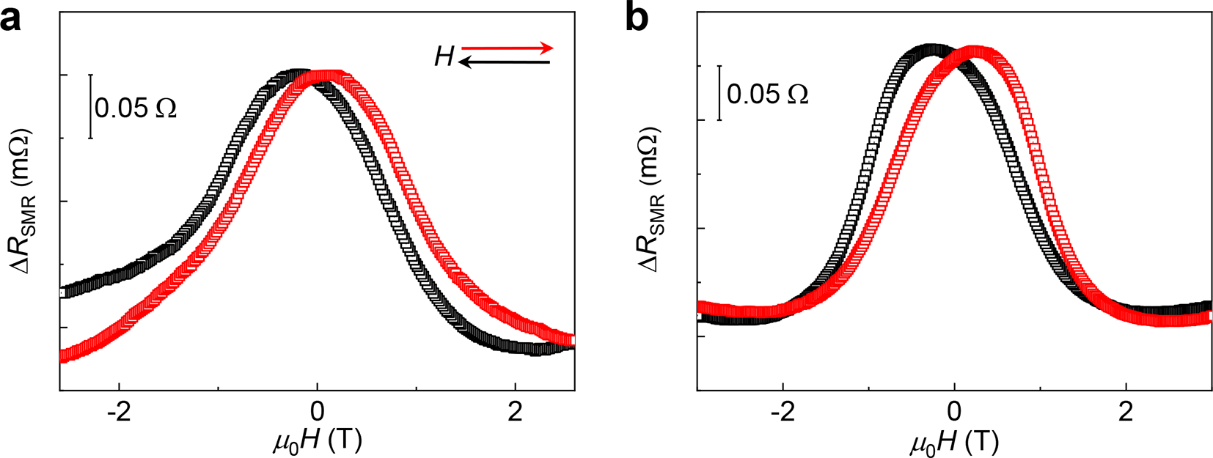
**

**Fig. S14. Magnetic field dependence of SMR in the Fe2O3/Cr2O3(*t*)/ Fe2O3/Pt samples at 300 K for comparatively thick spacer.** *t* = 6 nm (**a**) and *t* = 12 nm (**b**)**.**

**Note 14. Interlayer coupling in antiferromagnet with other spacer layer**

Apart from the Cr2O3 spacer, we also used nickel oxide NiO as the spacer layer to prepare Fe2O3(15)/NiO(5)/Fe2O3(15) (units in nanometers) junctions, which was deposited by radio frequency sputtering. Identical SMR measurements were carried out in the Fe2O3/NiO/Fe2O3/Pt samples. There exist two resistance peaks in the SMR curves (*T* = 250 K) in Fig. S15a, one at positive *H* and the other at negative *H*, similar to the Fe2O3/Cr2O3/Fe2O3/Pt case. This features as the interlayer coupling between the two Fe2O3 layers. Also visible is the two peaks persistently exist when decreasing the temperature to 125 K (Fig. S15b). It is then concluded that the interlayer coupling effect is not restricted to a certain spaced material.


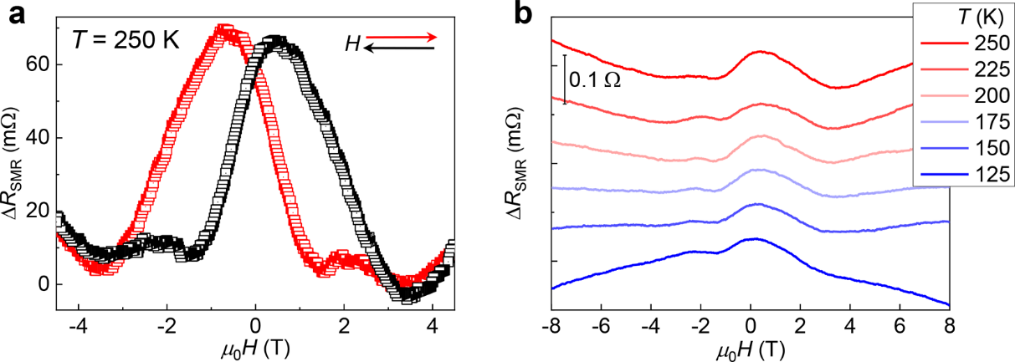


**Fig. S15. Magnetic field dependence of SMR in Fe2O3/NiO/Fe2O3/Pt. a,** Magnetic field dependence of SMR at *T* = 250 K. The arrows denote the sweeping direction of magnetic field. **b,** Magnetic field dependence of SMR at different temperatures with *H* sweeping from positive to negative.

In addition, the SMR measurements were carried out in Fe2O3/Al2O3/Fe2O3/Pt samples with a simple non-magnetic spacer (4 nm-thick Al2O3). Corresponding data are shown in Fig. S16. Only one resistance peak appears at *H* < 0 (*H* > 0) with *H* sweeping from positive to negative (negative to positive), which is quite characteristic for the negative SMR of the top antiferromagnetic Fe2O3 layer. And this feature is similar to the SMR data of Fe2O3 (Fig. 2a) and Cr2O3/Fe2O3 (Fig. 2b), reflecting the absence of interlayer coupling between the Fe2O3 layers when the spacer is Al2O3. This observation also supports that the quasi-long range order in Cr2O3 spacer play a fundamental role on the interlayer coupling between Fe2O3 layers.


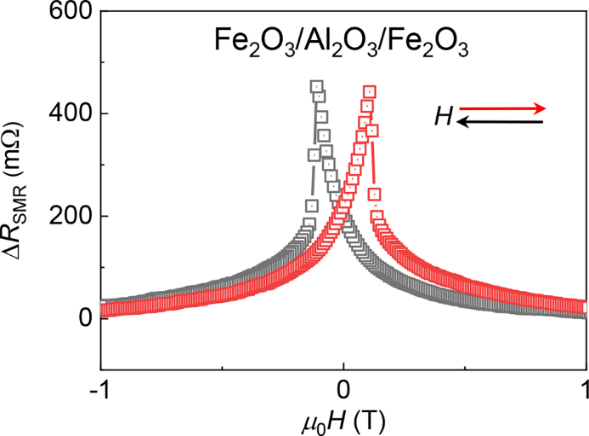


**Fig. S16. Magnetic field dependence of SMR in Fe2O3/Al2O3/Fe2O3/Pt.** The arrows denote the sweeping direction of magnetic field. There exists only one resistance peak at *H* < 0 (*H* > 0) with *H* sweeping from positive to negative (negative to positive).

**Note 15. Coupling energy calculation**

The temperature dependence of the free energy under the perpendicular and the parallel conditions, and , can be obtained by solving (1)(2) with Δ⊥ and Δ//, respectively. The coupling energy can be calculated by taking the free energy difference under the two conditions

.

The calculated coupling energy (≤ 200 K) with parameters listed in Table S1 is displayed in Fig. 4(f) in the main text, which semi-quantitatively agrees with the experimental curves.

We finally explain the conversion relationship between the coupling energy *E*c and the coupling field *μ*0*H*Coupling. When *E*c is higher than the Zeeman energy, the antiferromagnetic junction would be driven from the spin-flop state (*n* ⊥ *H* for both Fe2O3) towards the perpendicular state. The Zeeman energy mainly arises from the net magnetization induced by DMIS1. Taking the exchange field of 900 T, DMI effective field of 2 T, 18 moments in each sublattice in the 4nm thickness, and 5 *μ*B/atom for Fe2O3S2,S3,S6, *E*c is estimated to be 0.01 meV(per unit cell) for the coupling field 0.86 T. This energy is several orders smaller than the interfacial coupling energy between moments across the interface, consistent with the fact that the energy difference of the QLRO under parallel and perpendicular conditions is a high-order effect.

**Table S1. parameters for coupling energy calculation**

| *t* (nm) | Δ// (10–2meV) | Δ⊥ (10–2meV) | λ (10–4meV/K) | *b* (10–3meV) |
| --- | --- | --- | --- | --- |
| 3.0 | 2.50 | 1.50 | 1.67 | 8.33 |
| 3.5 | 1.98 | 1.19 |
| 4.1 | 3.44 | 2.82 | 14.17 |
| 4.4 | 2.99 | 2.45 |

**Supplementary References**

S1. Dzyaloshinsky, I. A thermodynamic theory of “weak” ferromagnetism of antiferromagnetics. *J. Phys. Chem. Solids* **4**, 241–255 (1957).

S2. Williamson, S. J. & Foner, S. Antiferromagnetic Resonance in Systems with Dzyaloshinsky-Moriya Coupling; Orientation Dependence in α-Fe2O3. *Phys. Rev.* **136**, A1102–A1106 (1964).

S3. Sulymenko, O. R. et al. Terahertz-Frequency Spin Hall Auto-oscillator Based on a Canted Antiferromagnet. *Phys. Rev. Appl.* **8**, 064007 (2017).

S4. Lebrun, R. et al. Long-distance spin-transport across the Morin phase transition up to room temperature in ultra-low damping single crystals of the antiferromagnet α-Fe2O3. *Nat. Commun.* **11**, 6332 (2020).

S5. Elliston, P. R., & Troup, G. J. Some antiferromagnetic resonance measurements in α-Fe2O3. *J. Phys. C. Solid State Phys.* **1**, 169 (1968).

S6. Han, J. et al. Birefringence-like spin transport via linearly polarized antiferromagnetic magnons. *Nat. Nanotechnol.* **15**, 563–568 (2020).

S7. Nozaki, T. & Sahashi, M. Magnetoelectric manipulation and enhanced operating temperature in antiferromagnetic Cr2O3 thin film. *Jpn. J. Appl. Phys.* **57**, 0902A2 (2018).

S8. Cheng, Y. et al. Anisotropic magnetoresistance and nontrivial spin Hall magnetoresistance in Pt/α−Fe2O3 bilayers. *Phys. Rev. B* **100**, 220408 (2019).

S9. Fischer, J. et al. Large spin Hall magnetoresistance in antiferromagnetic α-Fe2 O3/Pt Heterostructures. *Phys. Rev. Appl.* **13**, 014019 (2020).

S10. Ross, A. et al. Structural sensitivity of the spin Hall magnetoresistance in antiferromagnetic thin films. *Phys. Rev. B* **102**, 094415 (2020).

S11. Kuiper, P., Searle, B. G., Rudolf, P., Tjeng, L. H. & Chen, C. T. X-ray magnetic dichroism of antiferromagnet Fe2O3: The orientation of magnetic moments observed by Fe 2p x-ray absorption spectroscopy. *Phys. Rev. Lett.* **70**, 1549–1552 (1993).

S12. Gota, S., Gautier-Soyer, M. & Sacchi, M. Magnetic properties of Fe2O3 (0001) thin layers studied by soft x-ray linear dichroism. *Phys. Rev. B* **64**, 224407 (2001).
